# Supplementary material for: Demographic and Clinical Predictors of Mortality from Highly Pathogenic Avian Influenza A (H5N1) Virus Infection: CART Analysis of International Cases
Source: PLOS journal article supplement (doi:10.1371/journal.pone.0091630), 2014-03-25
Supplement: S1 (10.1371/journal.pone.0091630.s001) [file journal.pone.0091630.s001]

**Abstraction form S1**

**ABSTRACTION INFORMATION**

**Reviewer**

- MM
- RP
- NK

**Date:** \_\_\_\_\_

**CITATION INFORMATION**

**Search Engine:** \_\_\_\_\_

**Reference #:** \_\_\_\_\_

**Title:** \_\_\_\_\_

**Journal:** \_\_\_\_\_

**Year:** \_\_\_\_\_

**Authors:** \_\_\_\_\_

**Institution(s):** \_\_\_\_\_

**Relevant References:** \_\_\_\_\_

\_\_\_\_\_

\_\_\_\_\_

**LANGUAGE**

- English
- Other (describe language and translator): \_\_\_\_\_

### ARTICLE INCLUSION/EXCLUSION RATIONALE

Does this article meet inclusion criteria?

**YES. Requires all categories to meet criteria:**

- Human subject
- Individual case data available (including meta-analysis articles)
- Laboratory-confirmed influenza A (H5N1) virus OR suspected H5N1 case amongst known case cluster.
  - H5N1 culture *or*
  - H5N1 PCR study *or*
  - Antibody titer 1:80

**NO. Does not meet criteria for these reasons:**

- Non-human: molecular or animal
- Individual case details not provided
- Insufficient epidemiological data

**COMPLETE THE FOLLOWING IF THE ARTICLE MET INCLUSION CRITERIA:**

### STUDY DESIGN INFORMATION

Describe the study design:

### PRE-ADMISSION PREDICTOR VARIABLES DESCRIBED

**Demographic variables:**

- Country where A (H5N1) virus infection identified
- Per capita government expenditure on health (PCGEH)
- Season
- Age
- Sex
- Body Mass Index (BMI)
- Co-morbidities

**Infection-related variables:**

- Case is part of a cluster of known cases
- Contact with poultry prior to symptom onset
- Delay from symptom onset to hospitalization (days)

**POST-ADMISSION PREDICTOR VARIABLES DESCRIBED**

**Hospitalization variables:**

- Laboratory data
- Presence of pneumonia
- Acute respiratory distress syndrome (ARDS)
- Mechanical ventilation

**OUTCOME VARIABLES DESCRIBED**

- Mortality

**ADDITIONAL COMMENTS**
