# Supplementary material for: Demographic and Clinical Predictors of Mortality from Highly Pathogenic Avian Influenza A (H5N1) Virus Infection: CART Analysis of International Cases
Source: PLoS One. 2014 Mar 25;9(3):e91630. doi: 10.1371/journal.pone.0091630 (PMC3965392; doi:10.1371/journal.pone.0091630)
Supplement: Table S1 — Complete-cases logistic regression. (PDF) [file pone.0091630.s003.pdf]

**Table S1: Complete-cases logistic regression**

| Variable                 |            | Odds ratio (95% CI) | p value coefficient |
|--------------------------|------------|---------------------|---------------------|
| Age                      |            | 1.05 [1.03, 1.07]   | <0.0001             |
| Country                  | Egypt      | <i>Ref</i>          | <i>Ref</i>          |
|                          | Indonesia  | 11.54 [4.65, 31.01] | <0.0001             |
|                          | Other      | 3.78 [1.90, 7.67]   | 0.0002              |
| Delay to hospitalization |            | 1.17 (1.04, 1.32)   | 0.01                |
| PCGEH                    |            | 0.99 [0.99, 1.00]   | 0.06                |
| Sex                      | Male       | <i>Ref</i>          | <i>Ref</i>          |
|                          | Female     | 1.68 [0.93, 3.05]   | 0.09                |
| Contact with poultry     | No         | <i>Ref</i>          | <i>Ref</i>          |
|                          | Yes        | 2.20 [0.51, 8.89]   | 0.27                |
|                          | Likely yes | 4.93 [0.87, 28.06]  | 0.07                |
| Season                   | Summer     | <i>Ref</i>          | <i>Ref</i>          |
|                          | Fall       | 0.32 [0.10, 0.96]   | 0.05                |
|                          | Winter     | 1.00 [0.36, 2.67]   | 0.99                |
|                          | Spring     | 0.84 [0.30, 2.34]   | 0.74                |

*Model trained on cases without missing data on included variables or mortality (n=301).*

*Coefficient p-values were calculated using Wald's z-test.*

*This model includes all predictors included in the CART model.*
